# Supplementary material for: Old Sacred Trees as Memories of the Cultural Landscapes of Southern Benin (West Africa)
Source: MDPI journal article supplement (doi:10.3390/land11040478), 2022-03-26
Supplement: s1 [file s1]

## Supplementary Material

**Table S1.** List of Large old trees, used part, forms of use and purpose of use reported.

| Use Category                          | Plant Part | Form of Use                                                                                     | Purpose of Use                                                                  |
|---------------------------------------|------------|-------------------------------------------------------------------------------------------------|---------------------------------------------------------------------------------|
| <i>Adansonia digitata</i> L.          |            |                                                                                                 |                                                                                 |
| Food                                  | Fruit      | Use of the pulp for preparation of refreshing drinks                                            | Human nutrition                                                                 |
|                                       |            | Tinted with pink dye Seeds are used as candy by children because of the tangy taste of the pulp | Human nutrition                                                                 |
|                                       | Leaves     | Fresh or dried leaves, stabilized and powdered for sauce                                        | Human nutrition                                                                 |
| Medicine                              | Leaf       | Triturate + honey, macerate for 7 days and drink a glass (3 times/day)                          | Strengthens male fertility.                                                     |
|                                       | Bark       | Drink a glass (twice a day) of the infusion                                                     | Treatment of malaria                                                            |
| Handicraft                            | Bark       | Fibers processing                                                                               | making traditional sponges                                                      |
| Cultural                              | Tree       | Shelter of the cult of the divinity " Tôhwiyo"                                                  | Place of presentation and cultural baptism of newborns                          |
|                                       |            | Tree marked by the presence of fetish temple                                                    | Place of cultural ceremony to ward off bad spells, setbacks related to adultery |
|                                       | Timber     | Decaying wood of old age used as fertilizer                                                     | Soil improvement                                                                |
|                                       | Root       | To be combined with other species to fight against evil spirits.                                | Spiritual protection                                                            |
| Conservation                          | Hollow     | Nesting sites for birds                                                                         | Nesting sites for rollers and parrots                                           |
|                                       | Branches   | Nests                                                                                           | Eagles, vultures and storks nests                                               |
| <i>Azelia africana</i> Smith ex Pers. |            |                                                                                                 |                                                                                 |
| Handicraft                            | Timber     | Processing wood                                                                                 | Making household items such as boxes, bowls, spoons, mortars and masks          |
| Food                                  | Leaf       | Eat as a vegetable                                                                              | Human nutrition                                                                 |
|                                       | Flower     | Eat as a condiment in sauces                                                                    | Human nutrition                                                                 |

|                             |               |                                                                          |                                                                                                            |
|-----------------------------|---------------|--------------------------------------------------------------------------|------------------------------------------------------------------------------------------------------------|
| Medicine                    | Root          | Powdered root                                                            | Applied externally to treat rheumatism                                                                     |
| Antiaris toxicaria Engl.    |               |                                                                          |                                                                                                            |
| Food                        | Fruit         | Eat                                                                      | Human nutrition                                                                                            |
| Medicine                    | Bark, Leaf    | Leaves and bark in decoction                                             | Used as a febrifuge to treatFever                                                                          |
|                             | Leaf          | Leaves are used as an analgesic and vermifuge                            | Treat stomachache                                                                                          |
| Handicraft                  | Bark          | Processing inner bark                                                    | Handicraft objects : Production coarse clothes, hammocks, sandals, hut walls, ropes, bags, mats and paper. |
| Cultural                    | Bark          | Processing of latex of bark                                              | Glue for birds                                                                                             |
|                             | Tree          | Sometimes planted as a line tree                                         | Agroforestry system                                                                                        |
|                             |               | Sacred tree for the followers of the deity "Toxôsu                       | Place of rituals to wash away the curse of Mentally retarded and their parents                             |
|                             |               | Tree surrounded by a white cloth                                         | Place of ceremonies for requests and thanks by the followers to the deity                                  |
| Blighia sapida K. D. Koenig |               |                                                                          |                                                                                                            |
| Food                        | Fruit         | Eat fresh fruit                                                          | Human nutrition                                                                                            |
|                             | Fruit         | Added to sauces in dried and powdered form.                              | Human nutrition                                                                                            |
|                             | Leaf          | Leaves steamed and used as a vegetable                                   | Human nutrition                                                                                            |
| Medicine                    | Bark          | Rubbing the body with ground bark and chilli pepper (Capsicum annuum L.) | Relieve migraines                                                                                          |
|                             | Bark and leaf | Decoction                                                                | Treatment of intercostal pain, dysentery and diarrhoea                                                     |
|                             | Fruit         | Paste of fruit pulp                                                      | Externally application to cure panicitis                                                                   |
| Handicraft                  | Timber        | Charcoal production                                                      | Sale and household use                                                                                     |
|                             |               | Powder of capsules                                                       | Production of traditional soap                                                                             |

|                                                 |        |                                                                                |                                                                                        |
|-------------------------------------------------|--------|--------------------------------------------------------------------------------|----------------------------------------------------------------------------------------|
|                                                 | Fruit  | Ash from burnt capsules spread locally on crops to repel certain insect pests. | Insect repellent                                                                       |
| Cultural                                        |        | Tree marking space                                                             | Tree delimiting the royal palaces                                                      |
| <b><i>Rhodognaphalon brevicuspe</i> Sprague</b> |        |                                                                                |                                                                                        |
| Handicraft                                      | Timber | Used in carpentry                                                              | Production of veneers, plywood, crates, light furniture                                |
| Medicine                                        | Root   | Root powder paste                                                              | Treatment of rheumatism and dysentery                                                  |
|                                                 | Bark   | Gargle of bark decoction                                                       | Treatment of sore throat and for healing wounds                                        |
| <b><i>Borassus aethiopum</i> Mart.</b>          |        |                                                                                |                                                                                        |
| Food                                            | Root   | Eat hypocotyls                                                                 | Human nutrition                                                                        |
| Handicraft                                      | Leaf   | Dyed and woven leaves                                                          | Making hats, bags, fans and decorative pots                                            |
| Medicine                                        | Leaf   | Decoction                                                                      | Used as an anti-inflammatory to treat fever and pains                                  |
| <b><i>Ceiba pentandra</i> L. Gaertn.</b>        |        |                                                                                |                                                                                        |
| Cultural                                        | Thorn  | Search for 16 thorns and keep them with you to protect you from evil spirits   | Spiritual protection                                                                   |
|                                                 | Tree   | Sacred tree for the followers of the divinity "Dan"                            | Place of ritual to the deity to ask for protection, prosperity and wealth              |
|                                                 |        | Tree marked by the presence of altar for the divinity                          | Gathering of offerings                                                                 |
| Medicine                                        | Leaf   | Decoction of leaves                                                            | Reduce a high fever                                                                    |
| Handicraft                                      | Seed   | Production of a plant fibre called kapok.                                      | Used to stuff cushions, pillows, mattresses or waistcoats.                             |
|                                                 | Timber | Light wood processed as a source of lumber                                     | Manufacture of plywood, crates, boxes and dugouts                                      |
| <b><i>Cola gigantea</i> A. Chev.</b>            |        |                                                                                |                                                                                        |
| Medicine                                        | Leaf   | Maceration                                                                     | Anti-inflammatory properties to soothe pain and anti-microbial against wound infection |
| Food                                            | Seed   | Eat                                                                            | Human nutrition                                                                        |

| <i>Ficus umbellata</i> Vahl              |                |                                                                                           |                                                                       |
|------------------------------------------|----------------|-------------------------------------------------------------------------------------------|-----------------------------------------------------------------------|
| Food                                     | Leaf           | Leaves used in rabbit feed                                                                | Animal feed                                                           |
| Medicine                                 | Leaf           | External application of the crushed leaves                                                | Treatment of lower back pain                                          |
| <i>Irvingia gabonensis</i> Baill         |                |                                                                                           |                                                                       |
| Food                                     | Fruit          | Eat edible fresh fruit                                                                    | Human nutrition                                                       |
|                                          |                | Seeds ground or crushed and used as a thickening and flavouring agent in soups and stews. | Human nutrition                                                       |
| Medicine                                 | Fruit          | Eat fresh fruit                                                                           | Weight loss, cholesterol reduction                                    |
|                                          |                |                                                                                           | Treatment of diabetes.                                                |
|                                          | Bark           | Decoction                                                                                 | Pain Relief                                                           |
| <i>Lecaniodiscus cupanioïdes</i> Planch. |                |                                                                                           |                                                                       |
| Medicine                                 | Bark           | Powdered and burned bark                                                                  | Treatment of headaches and sinusitis                                  |
|                                          | Leaf and fruit | Decoction of leaves and fruits                                                            | Antibacterial, rubefacient and anthelmintic                           |
| <i>Milicia excelsa</i> (Welw.) C.C.Berg  |                |                                                                                           |                                                                       |
| Cultural                                 | Sap            | Put on the middle of head of babies                                                       | Close the babies' Fontanelle                                          |
|                                          | Tree           | Sacred tree for the followers of the Oro cult                                             | Used to mark the traditional nunneries                                |
| Medicine                                 | Root           | A root decoction                                                                          | To treat female sterility                                             |
|                                          | Leaf           | Drink the decoction                                                                       | Treatment of the spleen                                               |
|                                          | Root and bark  | A decoction of the root and stem bark                                                     | As an aphrodisiac                                                     |
|                                          | Bark           | Externally application of latex                                                           | Treat burns, wounds, sores and against eczema and other skin problems |

|                                          |       |                                              |                                                     |
|------------------------------------------|-------|----------------------------------------------|-----------------------------------------------------|
|                                          | Leaf  | Decoction of leaves                          | Used as galactagogue                                |
| <i>Parkia biglobosa</i> (Jacq.) R.Br.    |       |                                              |                                                     |
| Food                                     | Fruit | Mustard obtained from seeds to season sauces | Human nutrition                                     |
| Medicine                                 | Bark  | Externally application of boiled bark        | Treatment of infections, wounds and fever           |
| <i>Triplochiton scleroxylon</i> K.Schum. |       |                                              |                                                     |
| Cultural                                 | Trees | Wrapped in a white cloth                     | Used to prepare for the release of the divinity Oro |
|                                          | Bark  | Decoction                                    | Treatment of visual acuity                          |
| Food                                     | Leaf  | Used as a cooked vegetable or sauce          | Human nutrition                                     |
